# Supplementary material for: Antibiotics as a Feed Additive Promote Growth of Chickens by Modulating the Gut Microbiome
Source: Research Square preprint supplement (doi:10.21203/rs.3.rs-571302/v1), 2021-06-07
Supplement: Supplementary file 1 [file 28a5f396f584faecab93d7cf.docx]

**Serum lipid**

Control

100group

200group

400group

800group

BLANK

QC

**Serum metabolism**

Control

100group

200group

400group

800group

BLANK

QC

**Fecal metabolism**

Control

100group

200group

400group

800group

BLANK

QC
